# Supplementary material
Source: PubMed Central journal article supplement (PMC3823688)
Supplement: NIHMS497860-supplement-1_si_001.pdf [file NIHMS497860-supplement-1_si_001.pdf]

## SUPPORTING INFORMATION

### **Synthesis and evaluation of hetero- and homo-dimers of ribosome-targeting antibiotics: Antimicrobial activity, *in vitro* inhibition of translation, and drug resistance**

Yifat Berkov-Zrihen,<sup>†</sup> Keith D. Green,<sup>‡,§</sup> Kristin J. Labby,<sup>‡</sup> Mark Feldman,<sup>†</sup> Sylvie Garneau-Tsodikova,<sup>\*,‡,§</sup> and Micha Fridman<sup>\*,†</sup>

<sup>†</sup>School of Chemistry, Tel Aviv University, Tel Aviv, 69978, Israel

<sup>‡</sup>Department of Medicinal Chemistry and the Life Sciences Institute, University of Michigan, Ann Arbor, Michigan, 48109, United States

<sup>§</sup>Current address: Department of Pharmaceutical Sciences, University of Kentucky, Lexington, Kentucky, 40536, United States

Correspondence to: sylviegsodikova@uky.edu or mfridman@post.tau.ac.il

#### **Supporting Information Content:**

Table S1: Relative activity (%) for TOB and CAM derivatives compared to the parent drugs TOB (**1**) and CAM (**3**) against various drug-modifying enzymes. (p. S2)

Table S2: Purity of new dimers as determined by RP-HPLC (p. S18)

Figures S1-S30: <sup>1</sup>H and <sup>13</sup>C NMR of all new compounds generated in this study (p. S 3-S17)

Figures S31-S39: RP-HPLC traces showing the purity of all dimers from this study (p. S18-S21)

Figure S40: SDS-PAGE of the purified CPT and CNR CAM resistance enzymes (p. S21)

**Table S1.** Relative activity (%) for TOB and CAM derivatives compared to the parent drugs<sup>a</sup> TOB (**1**) and CAM (**3**) against various drug-modifying enzymes.

| Compound # | AAC(6')/APH(2'') | AAC(3)-IV       | AAC(6')-Ib'      | AAC(2')-Ic      | Eis             | ANT(4') |
|------------|------------------|-----------------|------------------|-----------------|-----------------|---------|
| <b>16</b>  | 34 ± 1           | 200 ± 26        | 39 ± 11          | 244 ± 10        | 404 ± 9         | 90 ± 10 |
| <b>18</b>  | 30 ± 1           | 143 ± 21        | 20 ± 5           | 165 ± 1         | 253 ± 1         | 38 ± 1  |
| <b>22</b>  | 34 ± 2           | 142 ± 18        | 31 ± 4           | 156 ± 3         | 269 ± 2         | 28 ± 2  |
| <b>20</b>  | 80 ± 3           | 184 ± 28        | 37 ± 4           | 203 ± 16        | 287 ± 14        | 63 ± 9  |
| <b>6</b>   | -- <sup>b</sup>  | -- <sup>b</sup> | -- <sup>b</sup>  | -- <sup>b</sup> | -- <sup>b</sup> | 49 ± 4  |
| Compound # | CPT              | CNR             | CAT <sub>I</sub> |                 |                 |         |
| <b>13</b>  | 51 ± 8           | 106 ± 41        | -- <sup>b</sup>  |                 |                 |         |
| <b>22</b>  | 91 ± 21          | 117 ± 43        | 70 ± 2           |                 |                 |         |
| <b>26</b>  | 139 ± 21         | 220 ± 76        | 73 ± 3           |                 |                 |         |
| <b>24</b>  | 96 ± 12          | 174 ± 74        | 69 ± 4           |                 |                 |         |
| <b>20</b>  | 110 ± 12         | 76 ± 28         | 82 ± 2           |                 |                 |         |
| <b>23</b>  | 97 ± 14          | 133 ± 43        | 10 ± 1           |                 |                 |         |
| <b>25</b>  | 33 ± 7           | 10 ± 1          | 3 ± 1            |                 |                 |         |

<sup>a</sup>TOB (**1**) and CAM (**3**) activity were set at 100% for comparison purposes.

<sup>b</sup>-- indicates not tested as the assay could not be utilized as it detects free thiols.

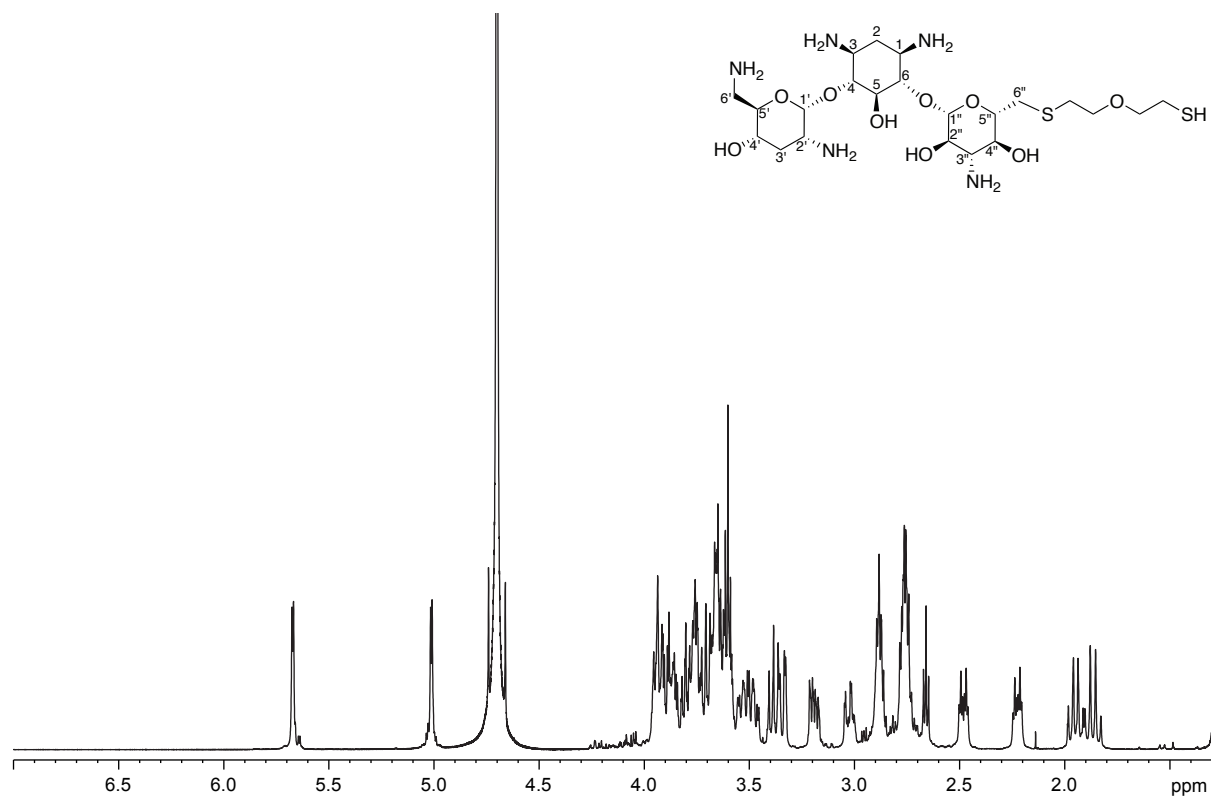

**Fig. S1.**  $^1\text{H}$  NMR in  $\text{D}_2\text{O}$  for compound 6.

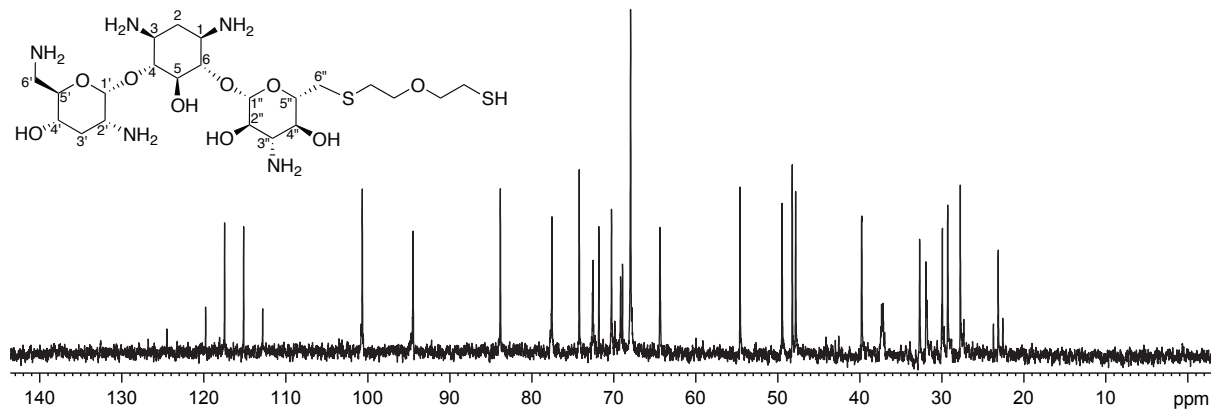

**Fig. S2.**  $^{13}\text{C}$  NMR in  $\text{D}_2\text{O}$  for compound 6.

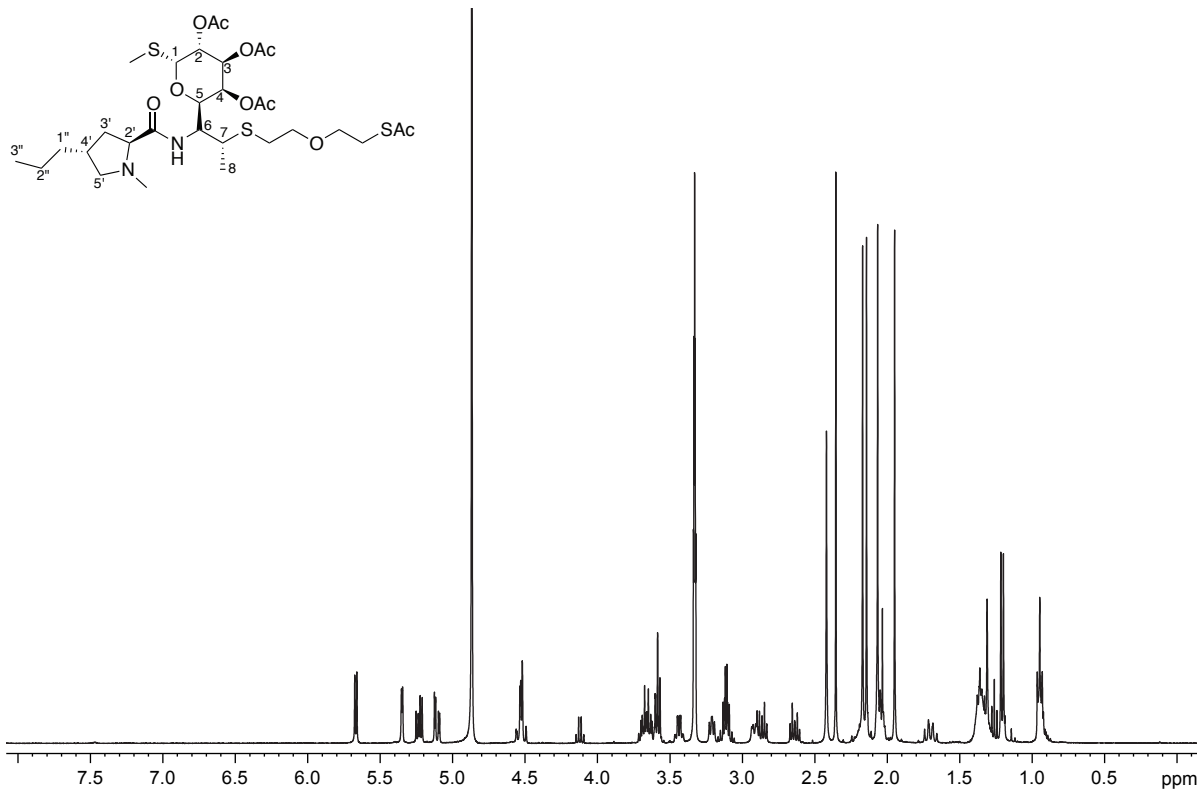

**Fig. S3.**  $^1\text{H}$  NMR in  $\text{CD}_3\text{OD}$  for compound **8**.

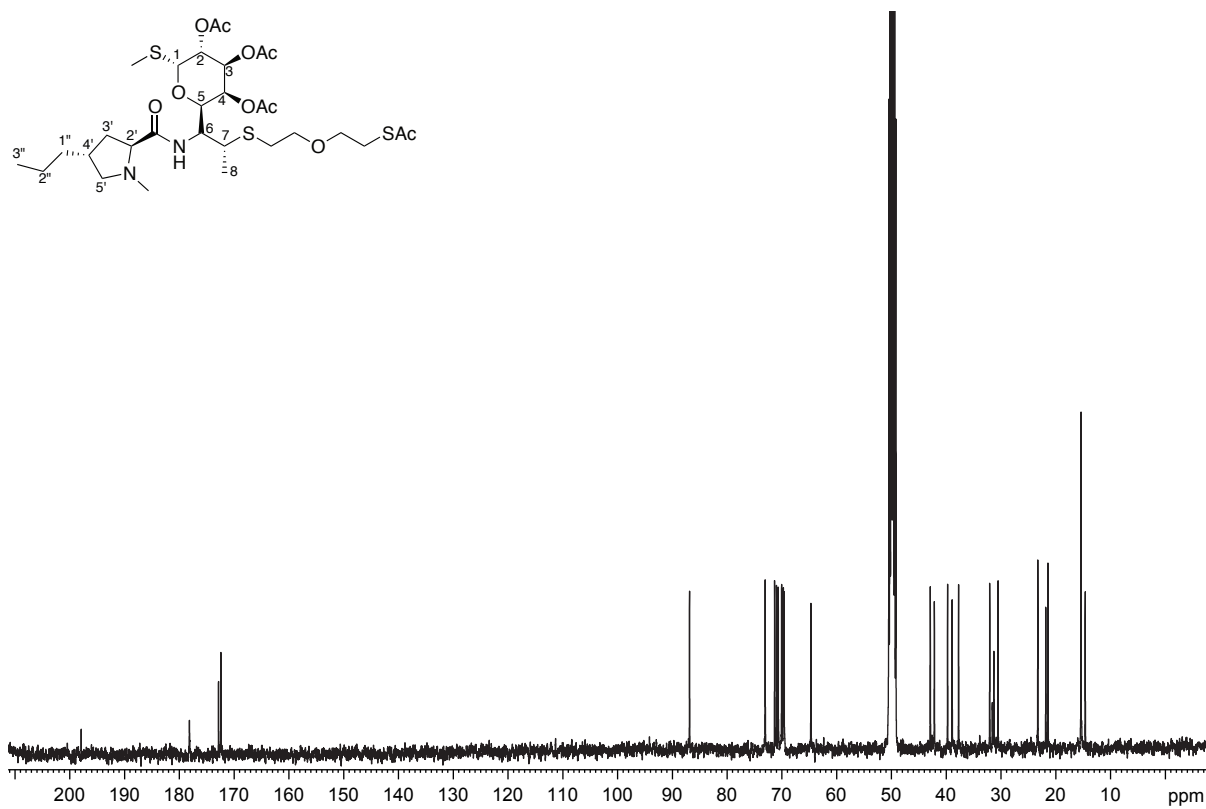

**Fig. S4.**  $^{13}\text{C}$  NMR in  $\text{CD}_3\text{OD}$  for compound **8**.

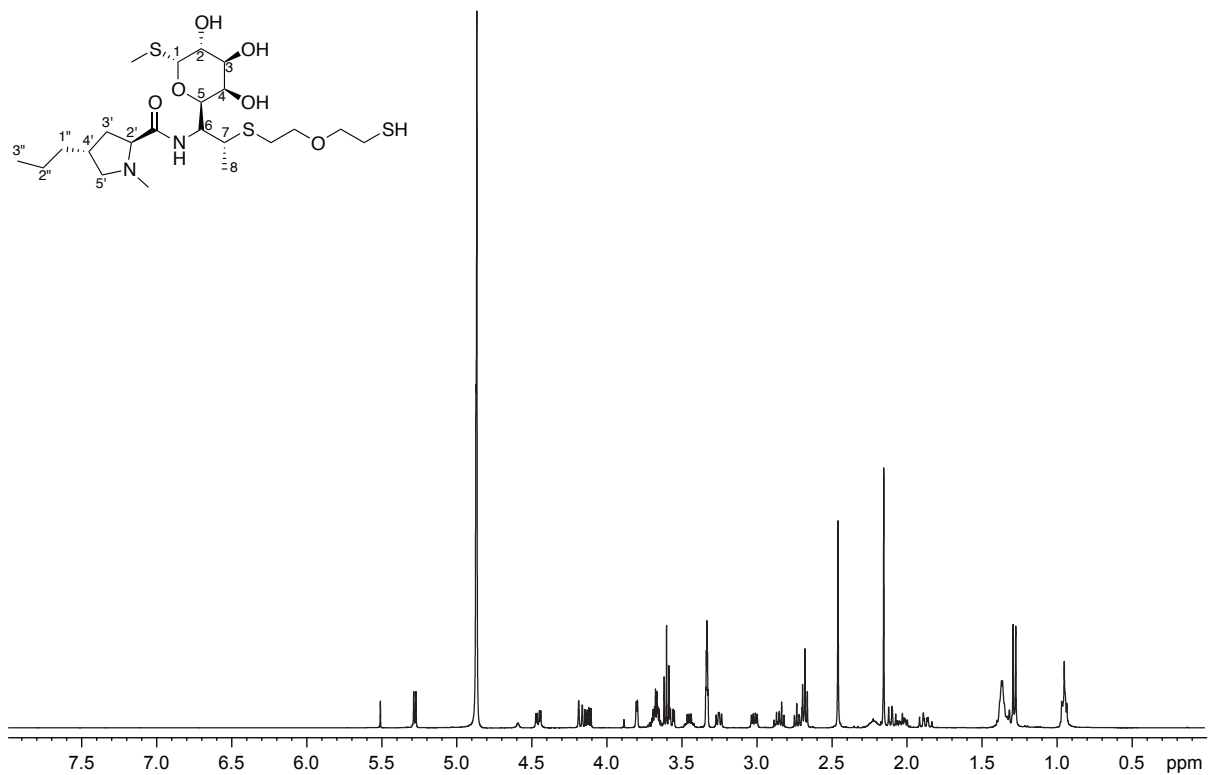

**Fig. S5.**  $^1\text{H}$  NMR in  $\text{CD}_3\text{OD}$  for compound **9**.

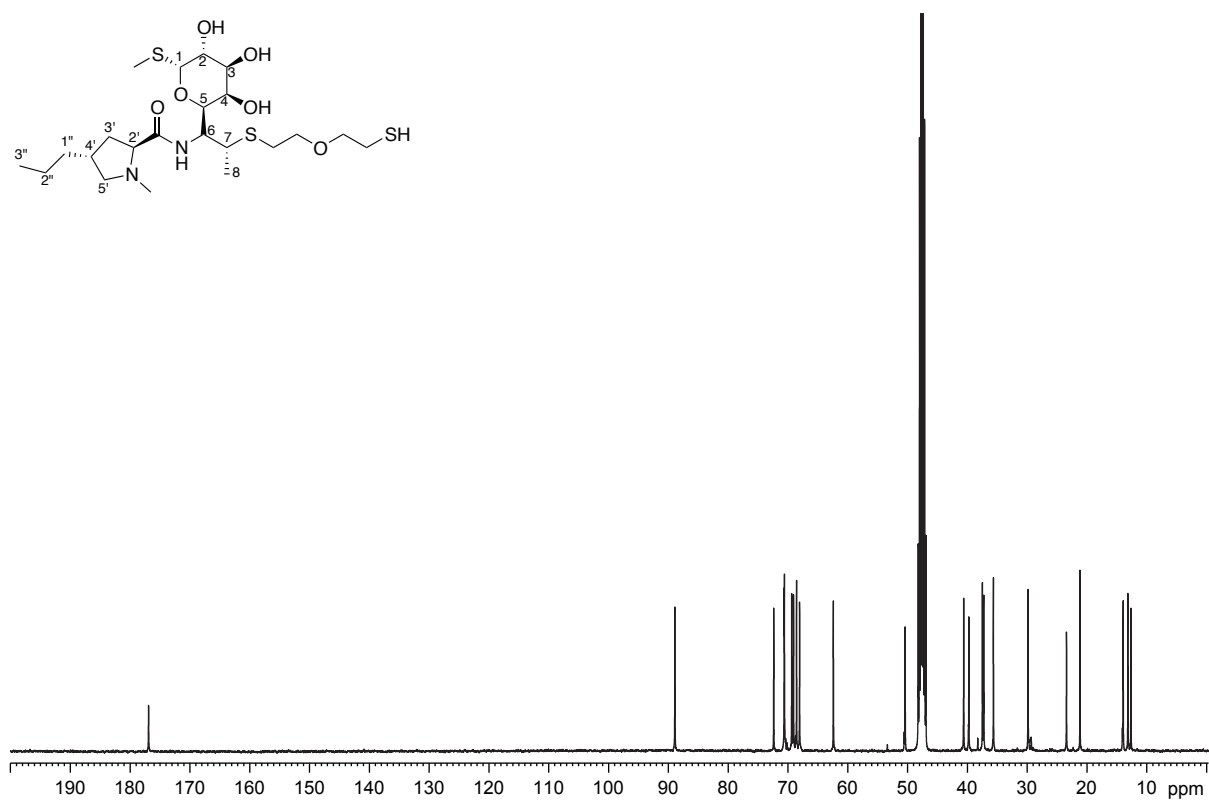

**Fig. S6.**  $^{13}\text{C}$  NMR in  $\text{CD}_3\text{OD}$  for compound **9**.

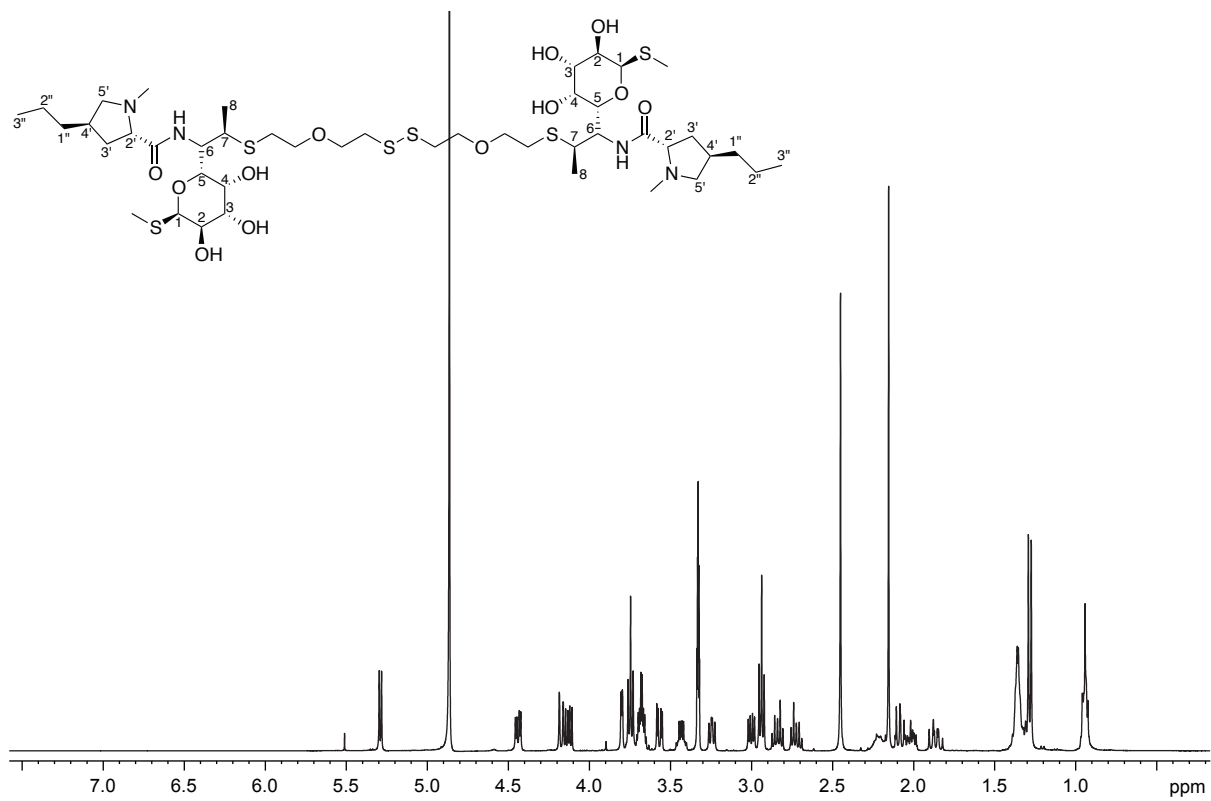

**Fig. S7.**  $^1\text{H}$  NMR in  $\text{CD}_3\text{OD}$  for compound **10**.

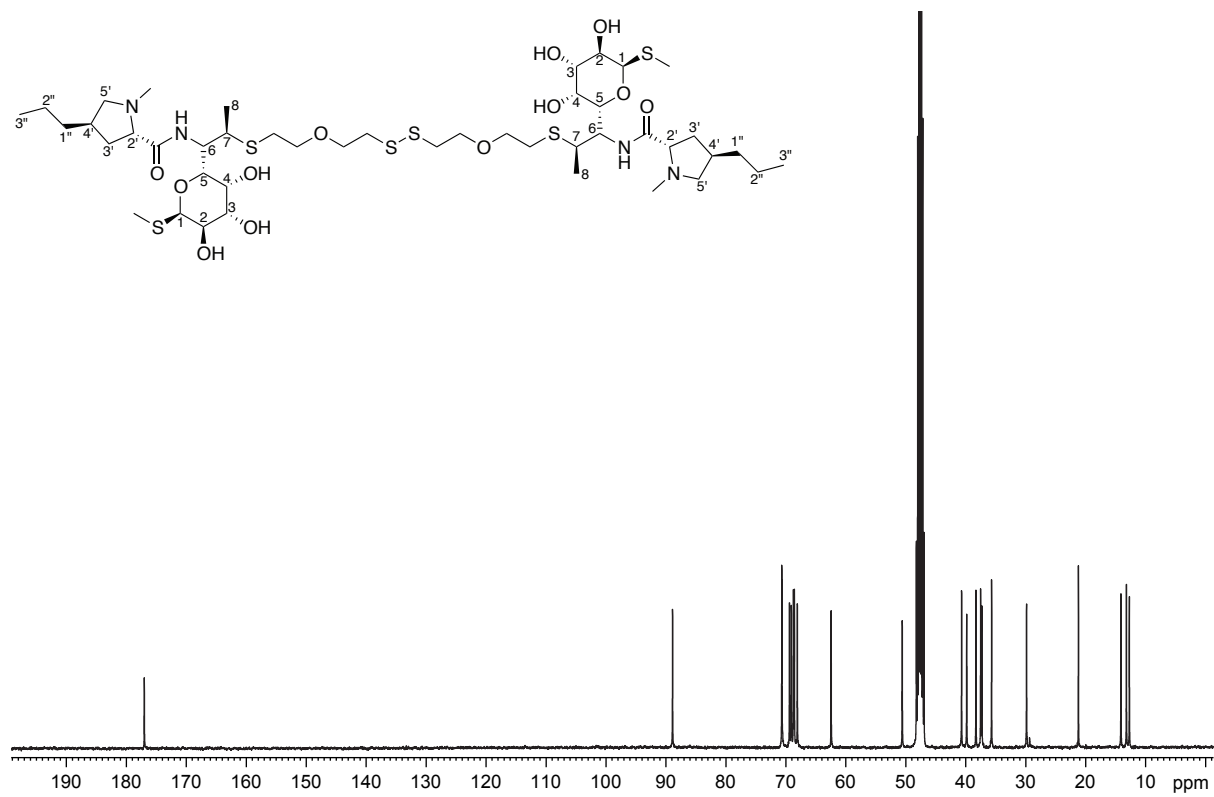

**Fig. S8.**  $^{13}\text{C}$  NMR in  $\text{CD}_3\text{OD}$  for compound **10**.

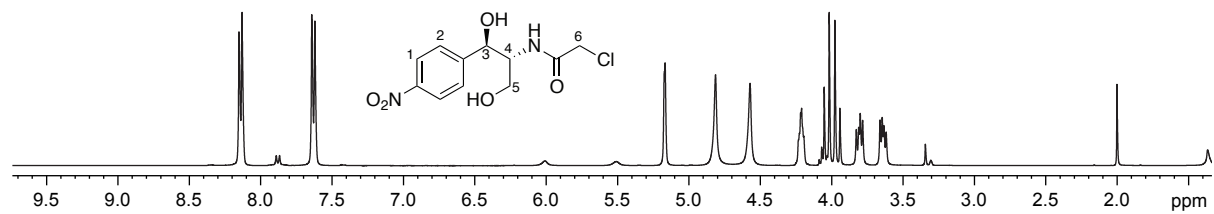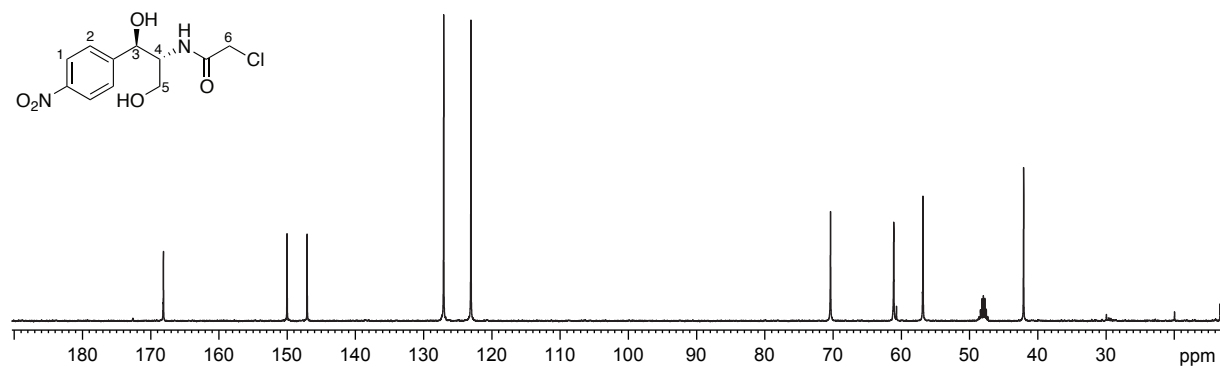

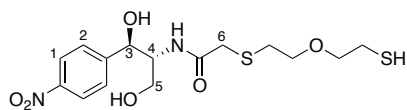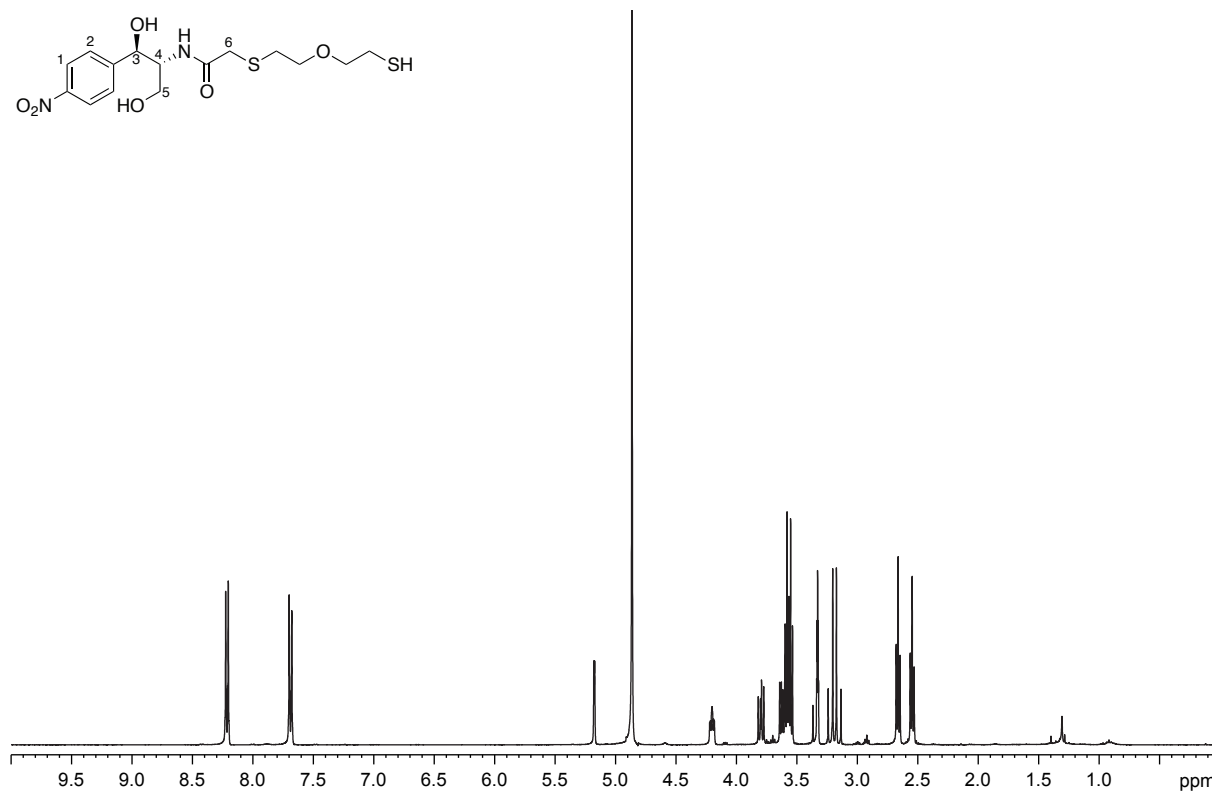

**Fig. S11.**  $^1\text{H}$  NMR in  $\text{CD}_3\text{OD}$  for compound 13.

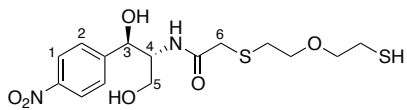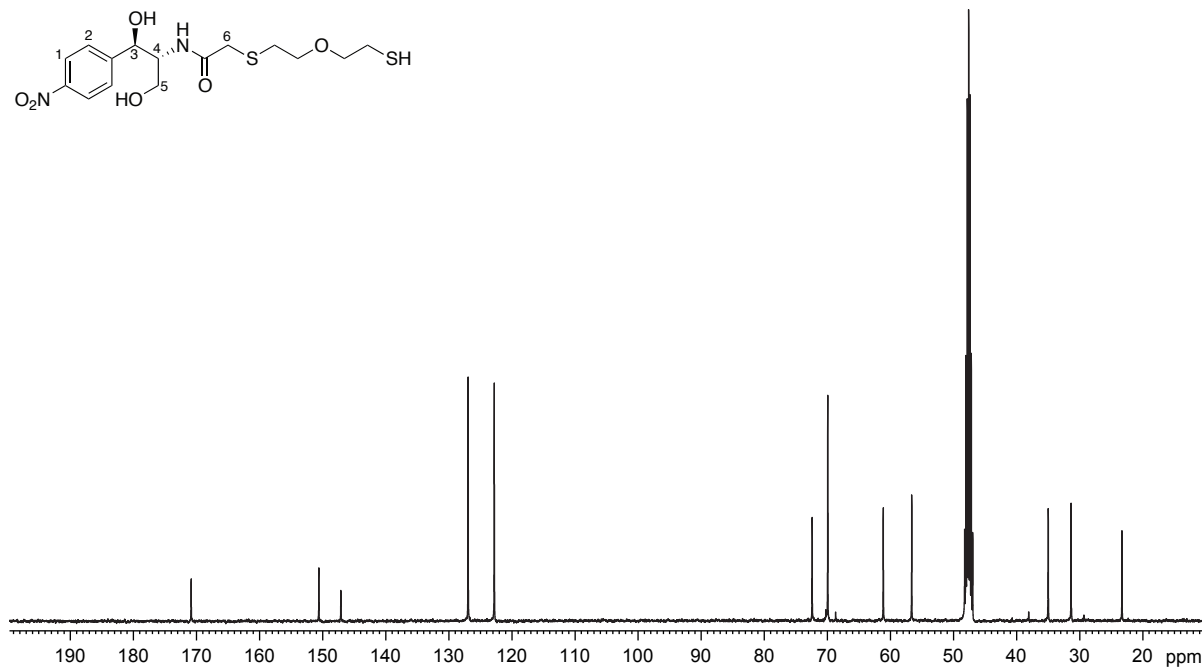

**Fig. S12.**  $^{13}\text{C}$  NMR in  $\text{CD}_3\text{OD}$  for compound 13.



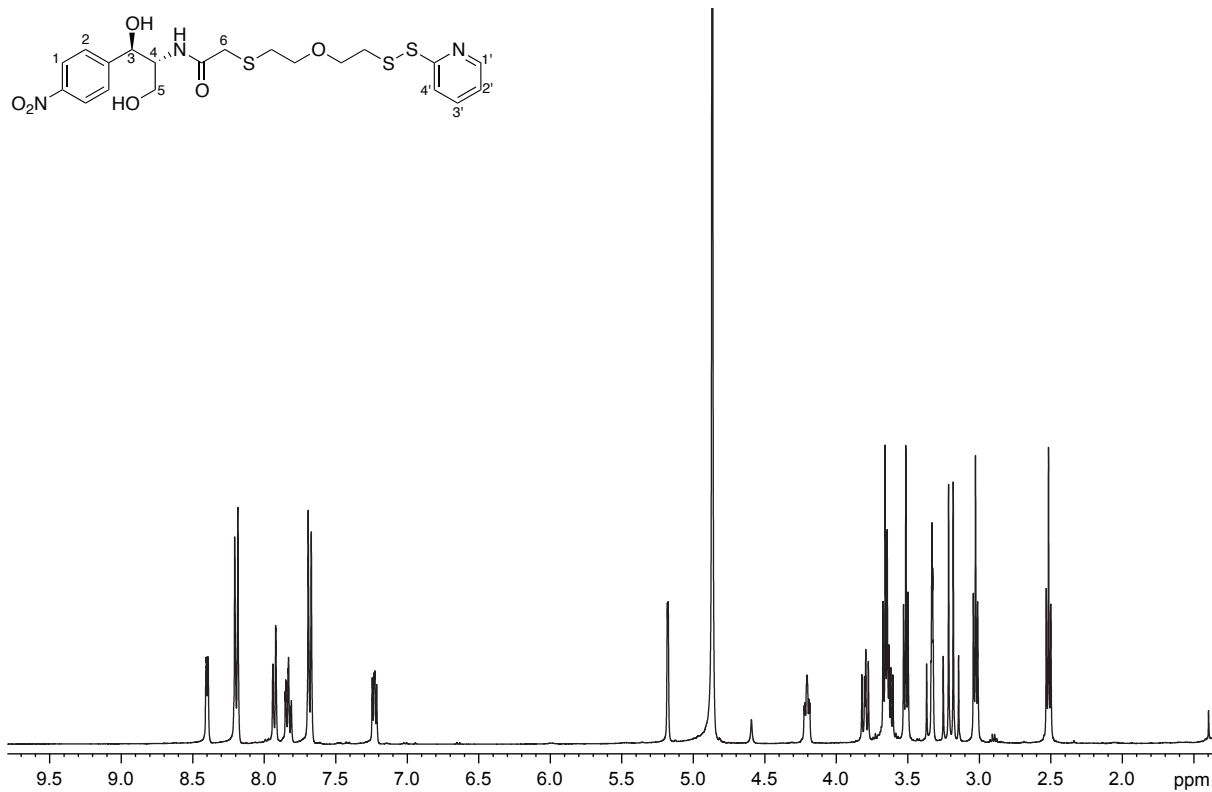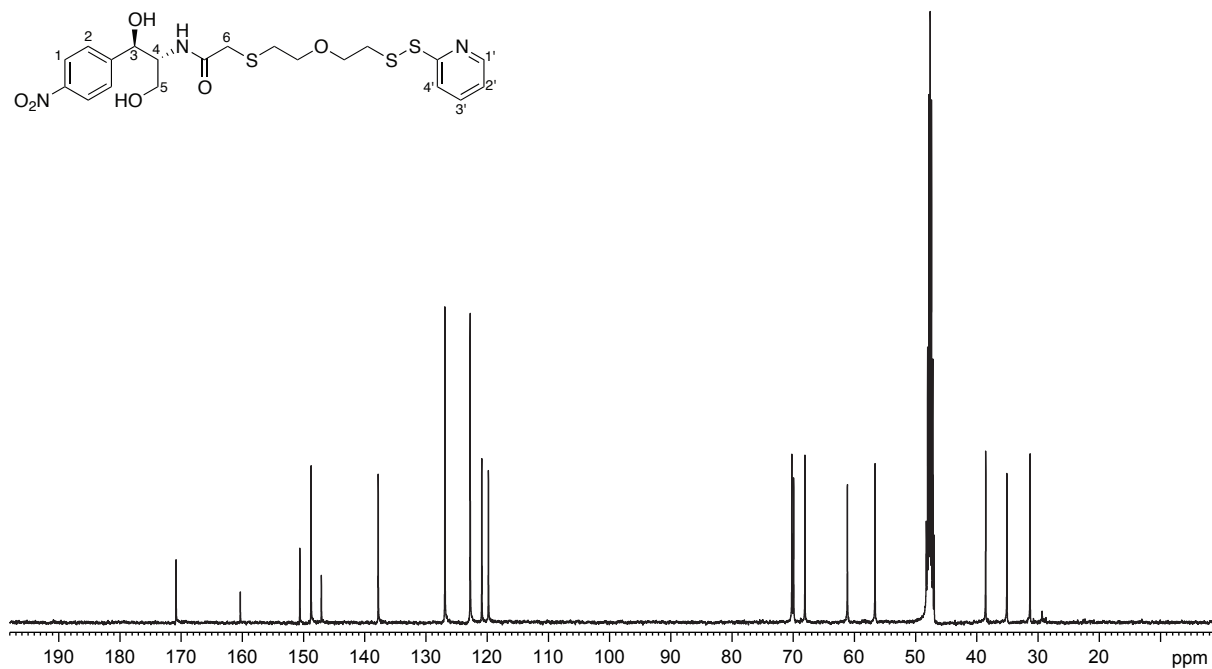

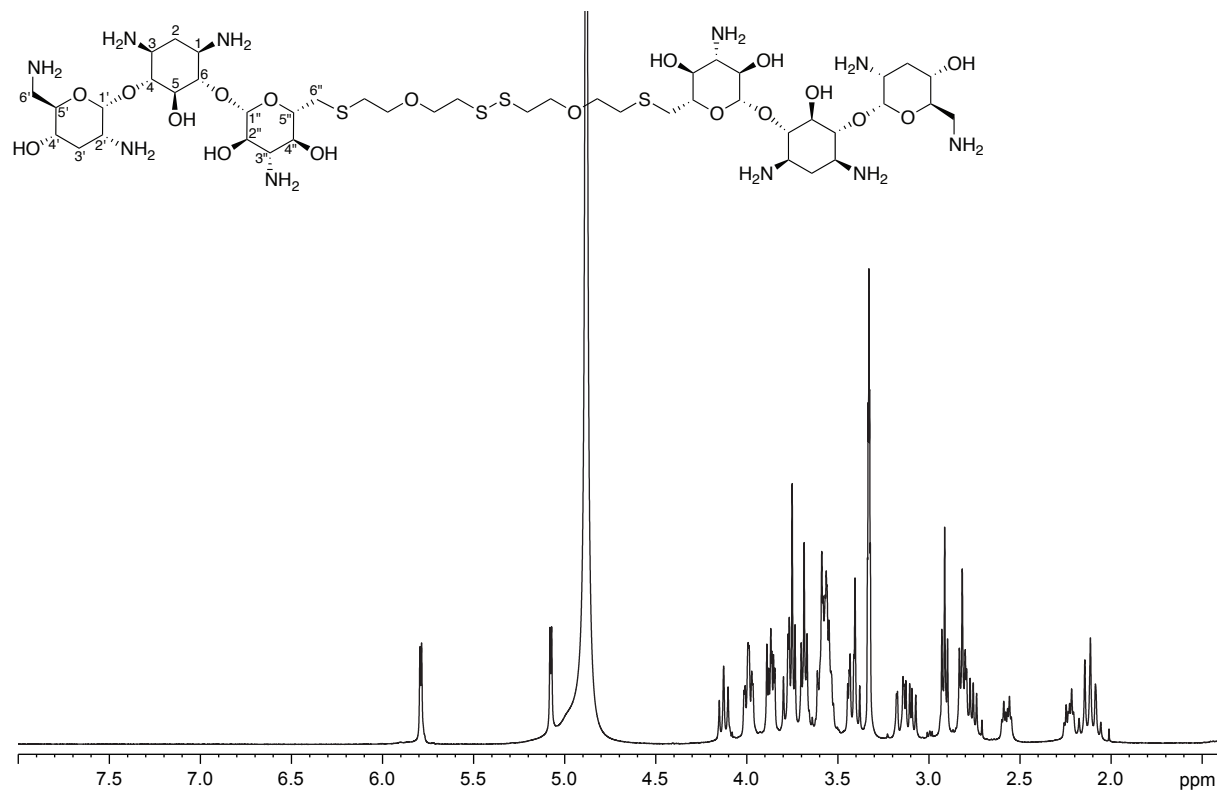

**Fig. S15.**  $^1\text{H}$  NMR in  $\text{CD}_3\text{OD}$  for compound **16**.

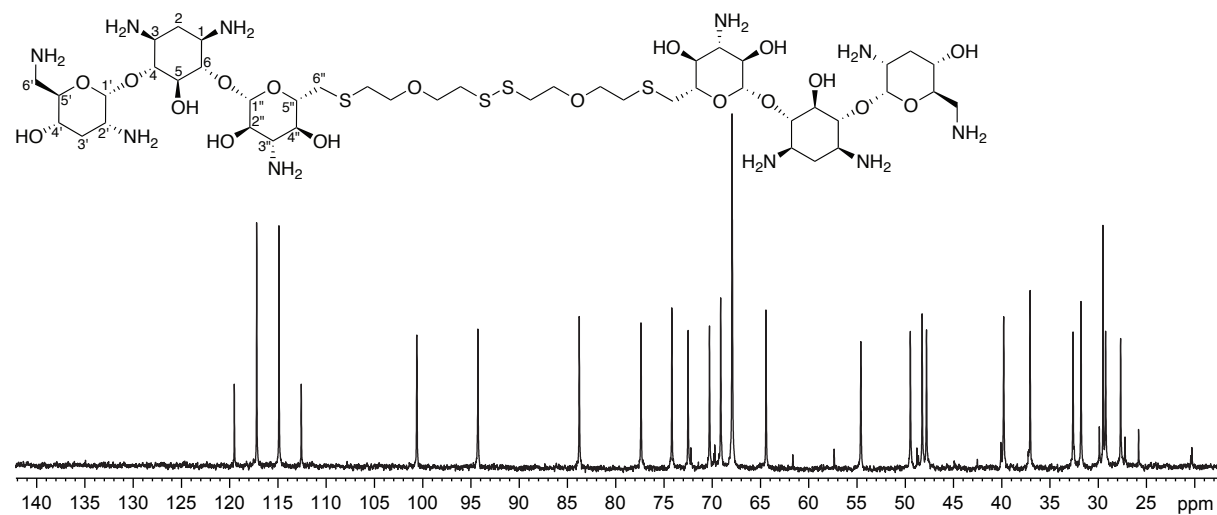

**Fig. S16.**  $^{13}\text{C}$  NMR in  $\text{CD}_3\text{OD}$  for compound **16**.

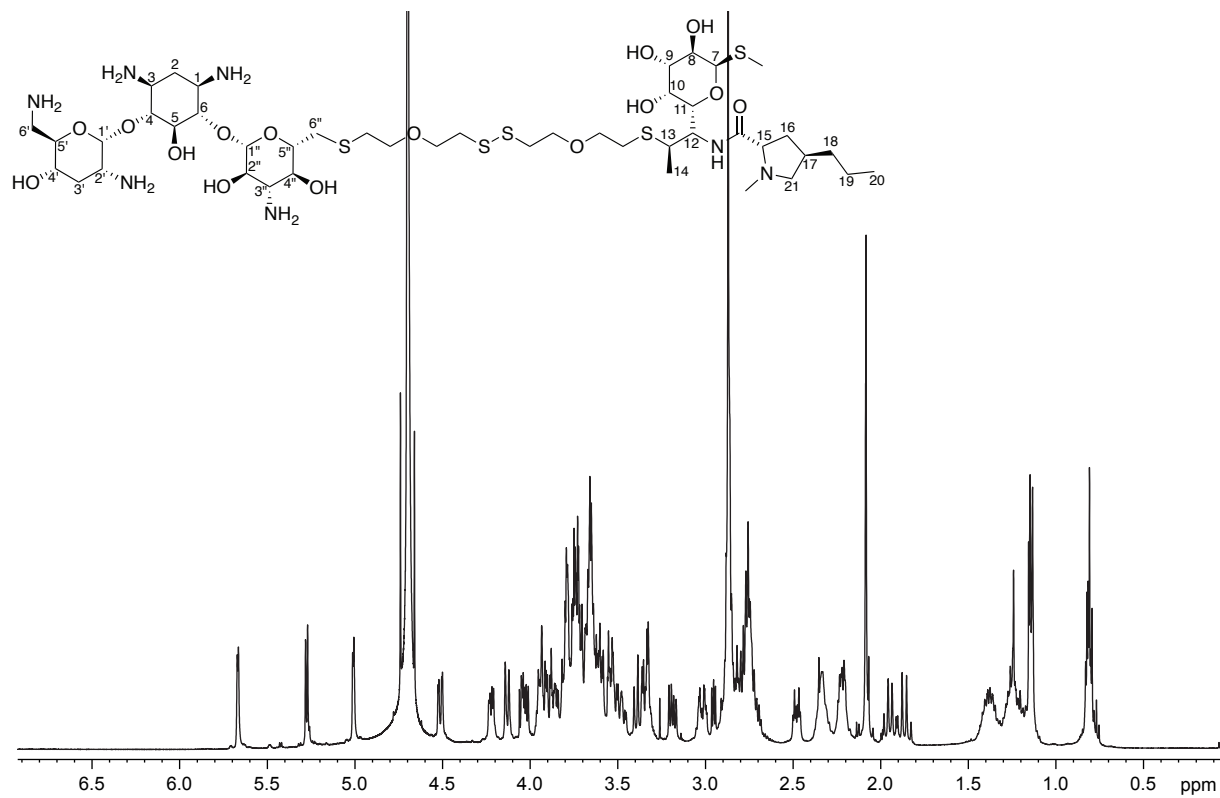

**Fig. S17.** <sup>1</sup>H NMR in D<sub>2</sub>O for compound 18.

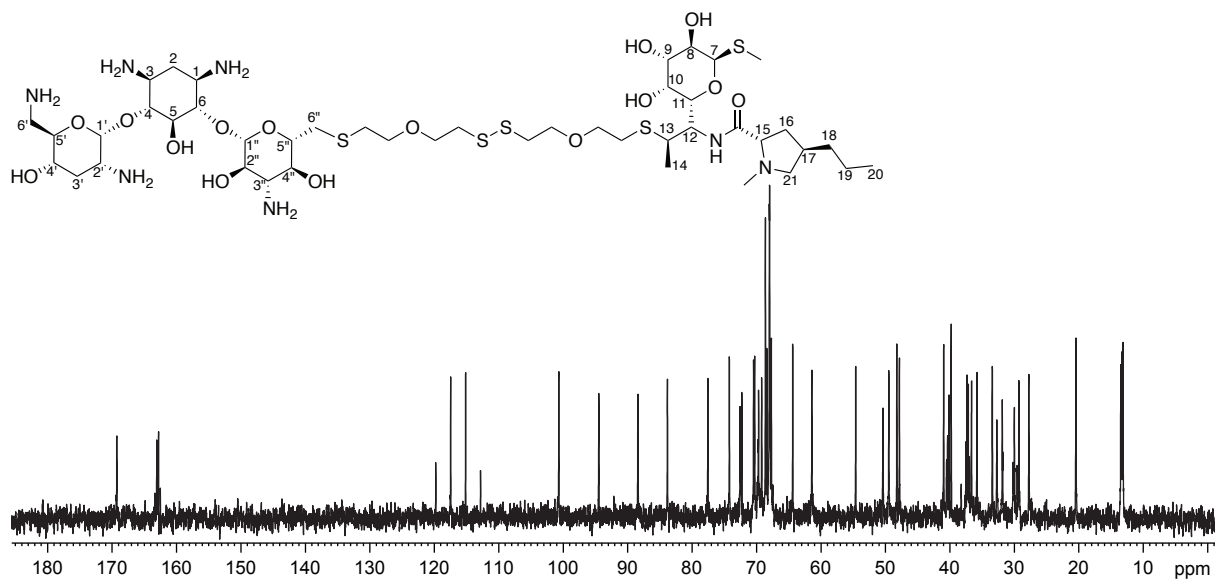

**Fig. S18.** <sup>13</sup>C NMR in D<sub>2</sub>O for compound 18.

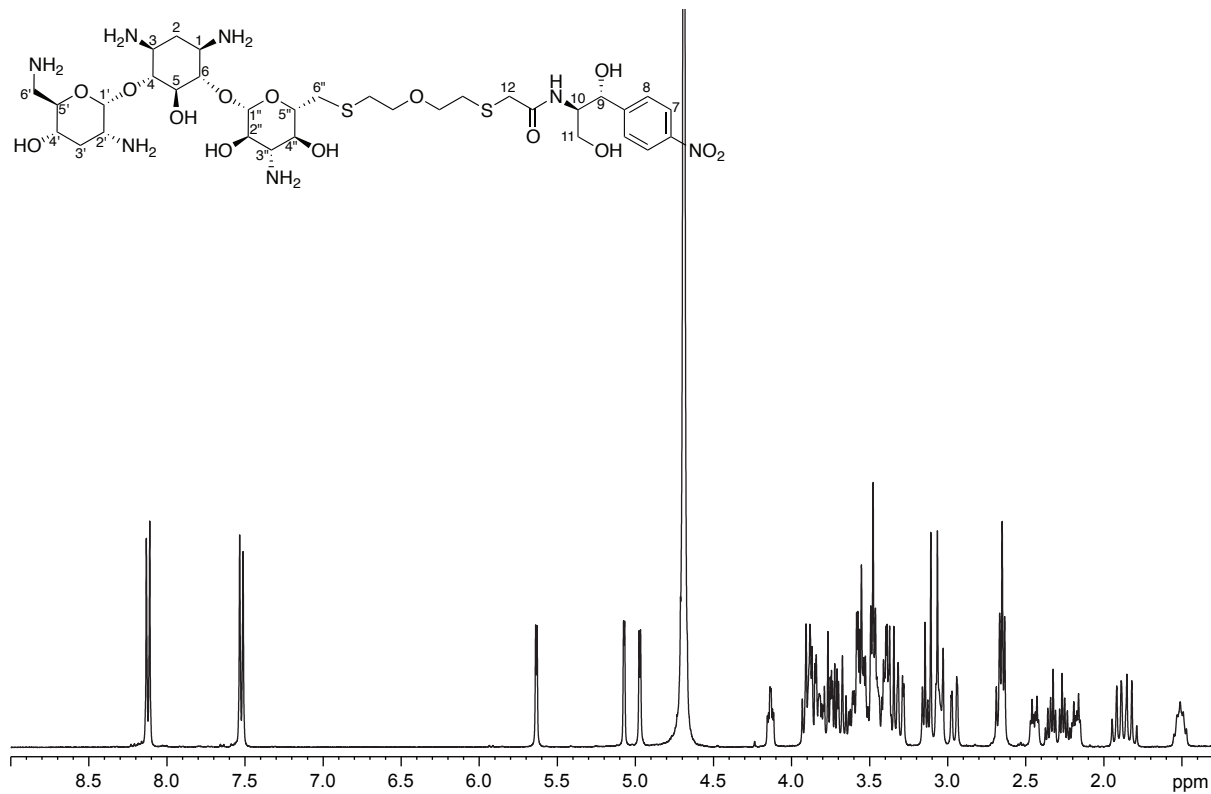

**Fig. S19.**  $^1\text{H}$  NMR in  $\text{D}_2\text{O}$  for compound 20.

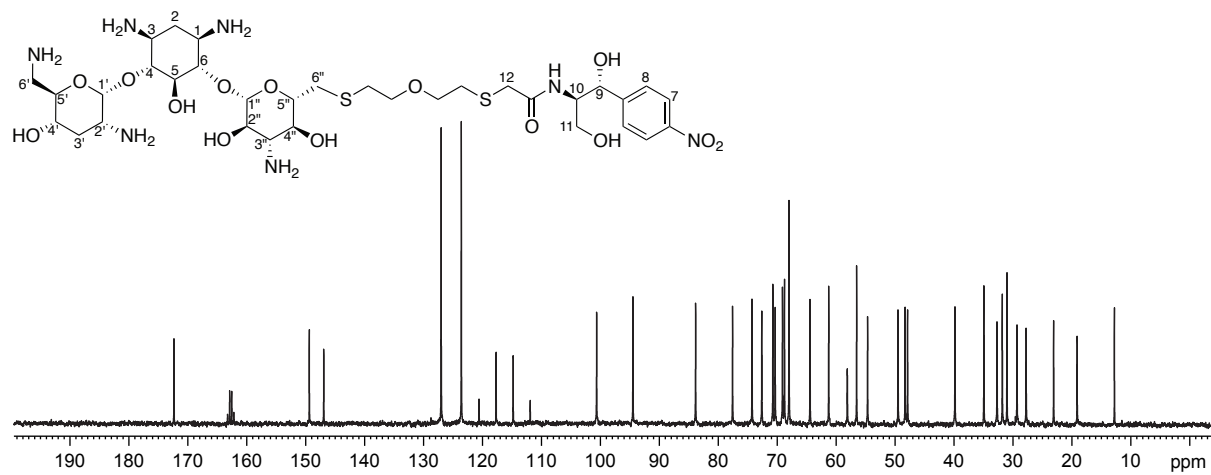

**Fig. S20.**  $^{13}\text{C}$  NMR in  $\text{D}_2\text{O}$  for compound 20.

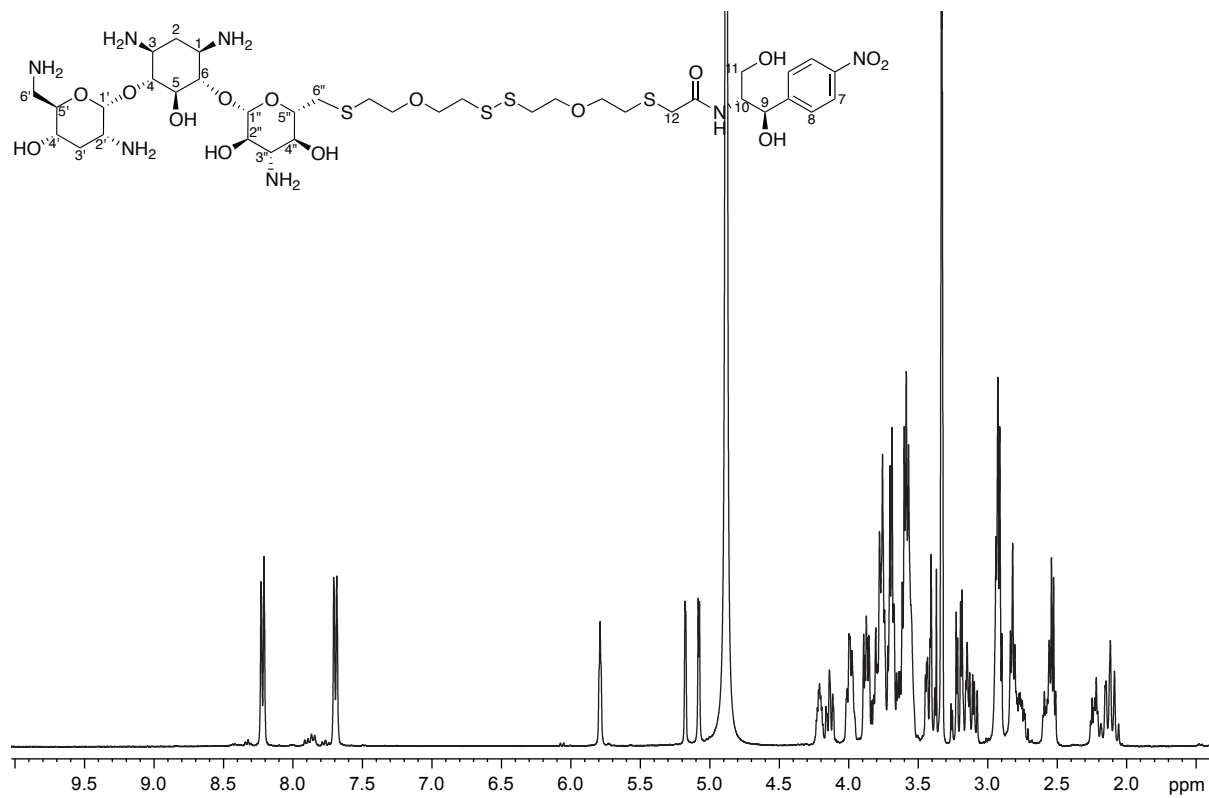

**Fig. S21.** <sup>1</sup>H NMR in CD<sub>3</sub>OD for compound 22.

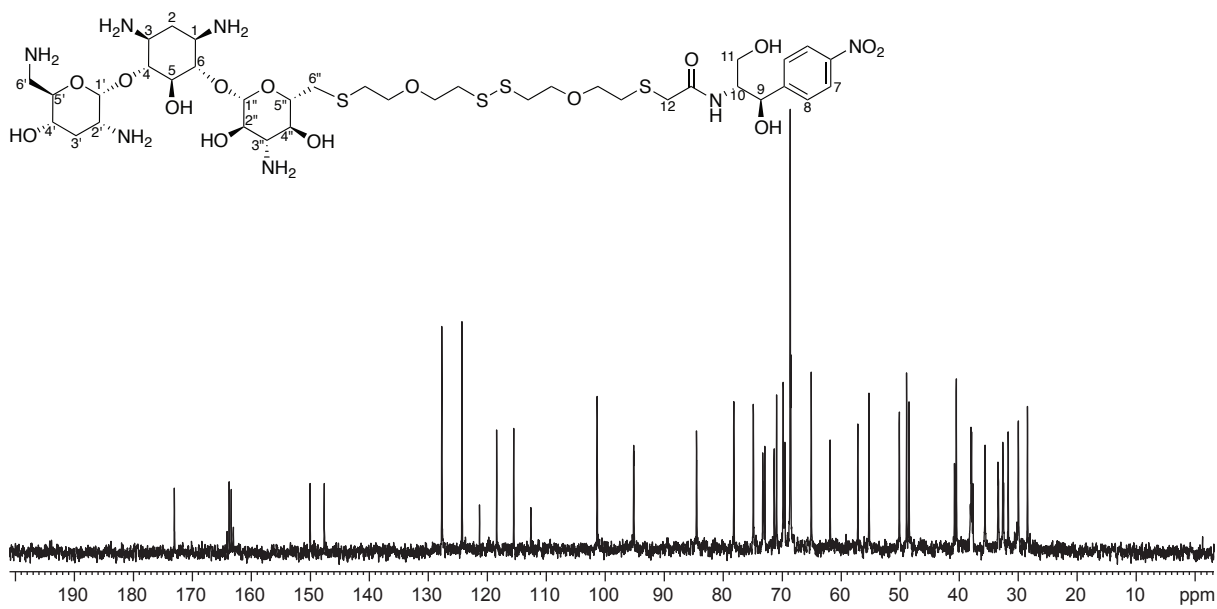

**Fig. S22.** <sup>13</sup>C NMR in D<sub>2</sub>O for compound 22.

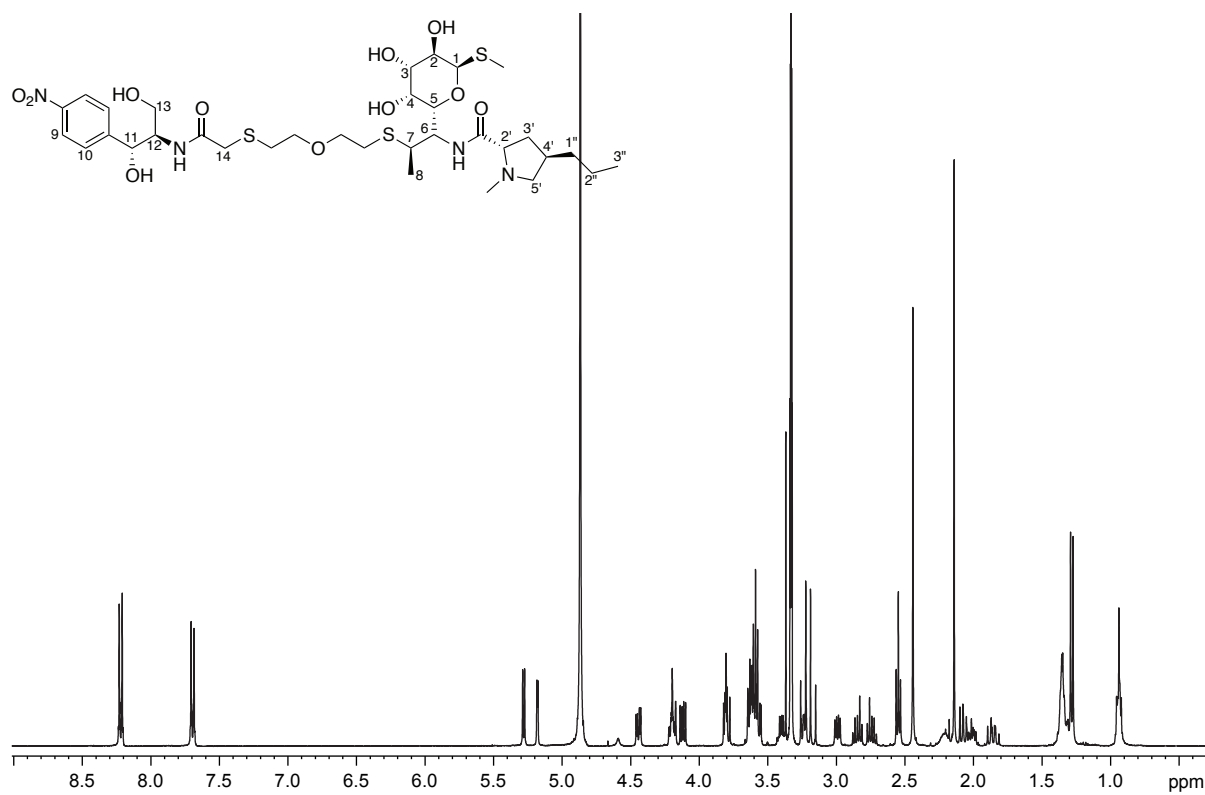

**Fig. S23.**  $^1\text{H}$  NMR in  $\text{CD}_3\text{OD}$  for compound **23**.

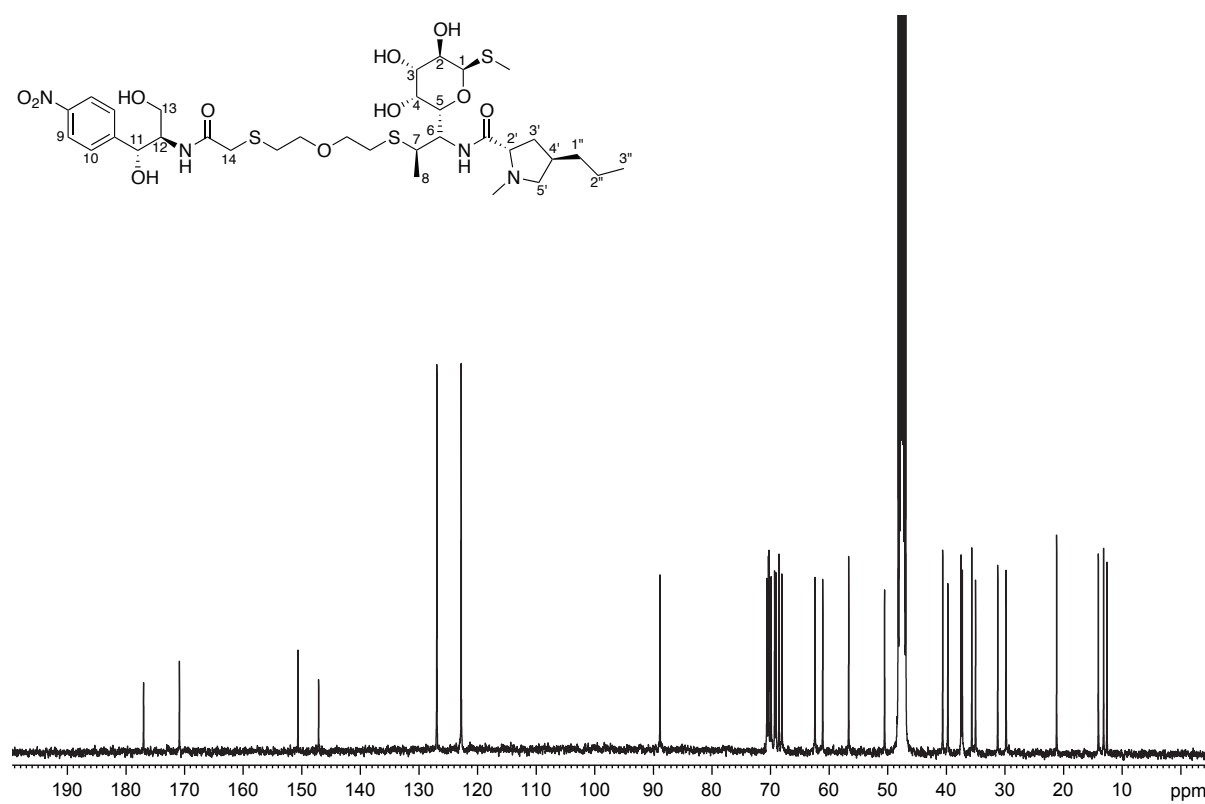

**Fig. S24.**  $^{13}\text{C}$  NMR in  $\text{CD}_3\text{OD}$  for compound **23**.

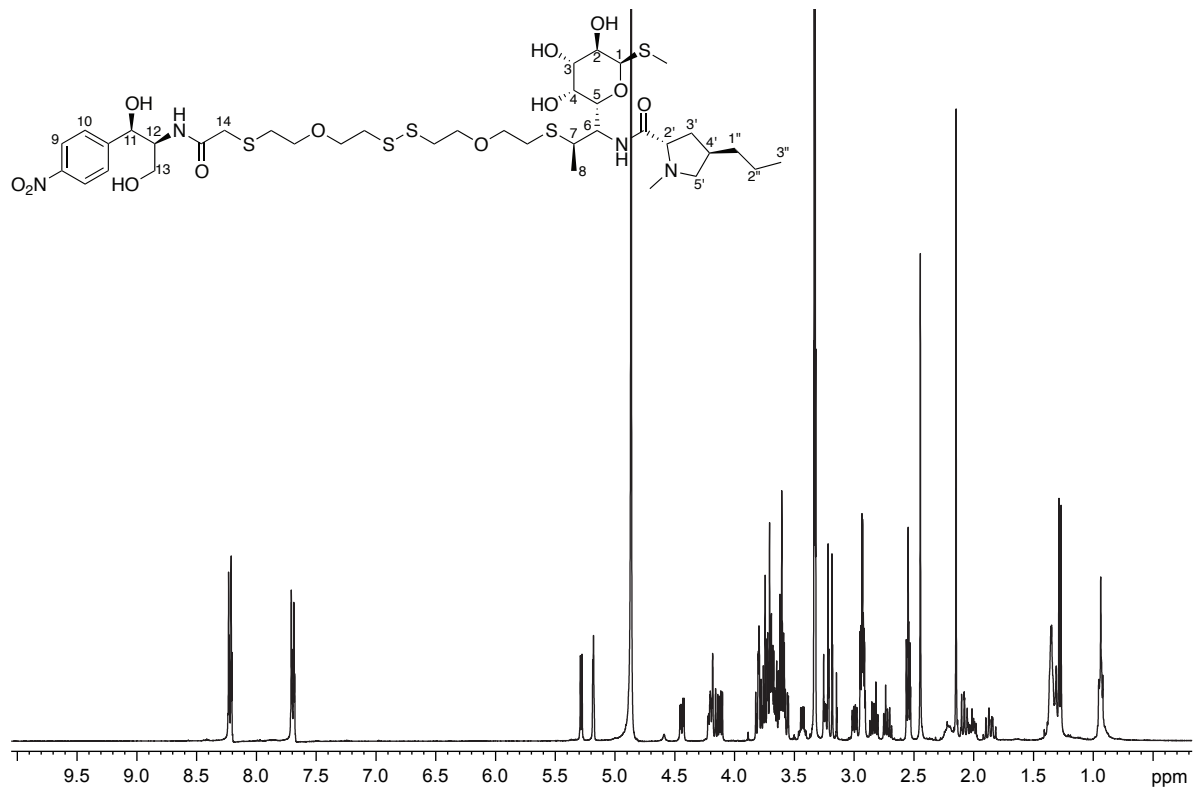

**Fig. S25.** <sup>1</sup>H NMR in CD<sub>3</sub>OD for compound 24.

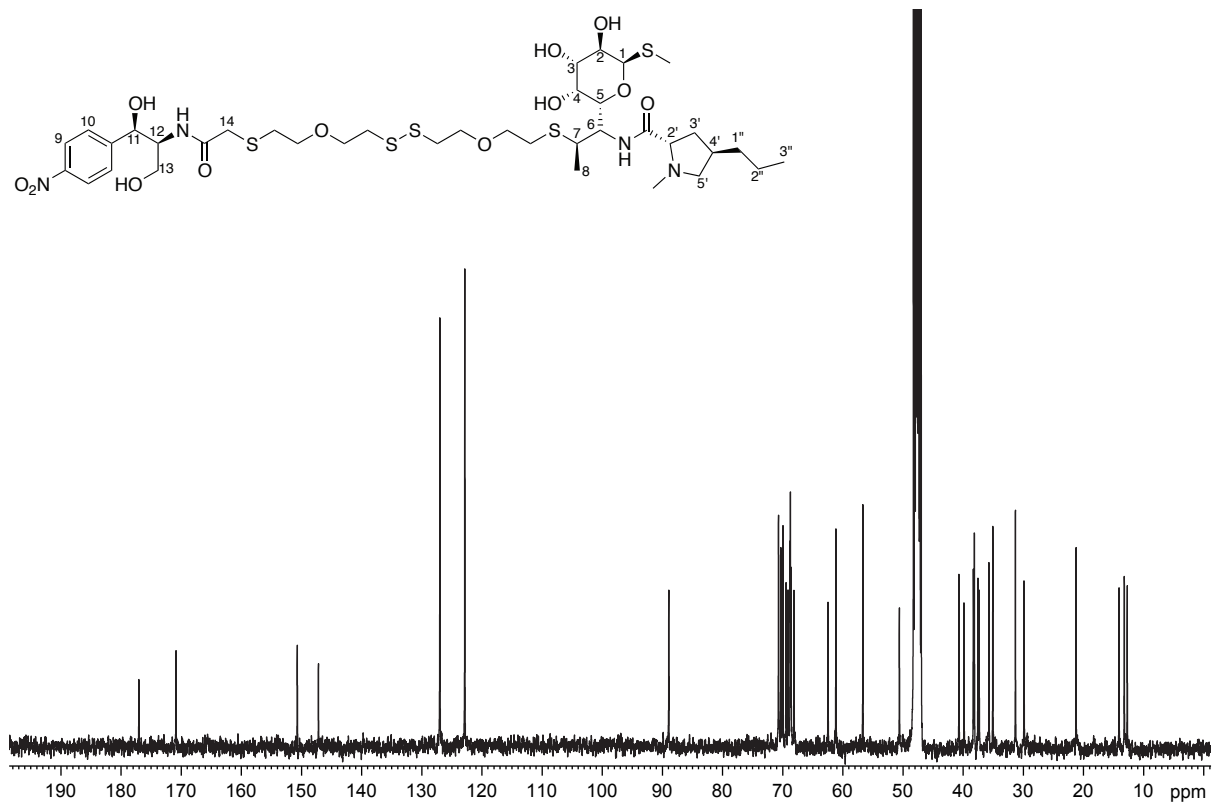

**Fig. S26.** <sup>13</sup>C NMR in CD<sub>3</sub>OD for compound compound 24.

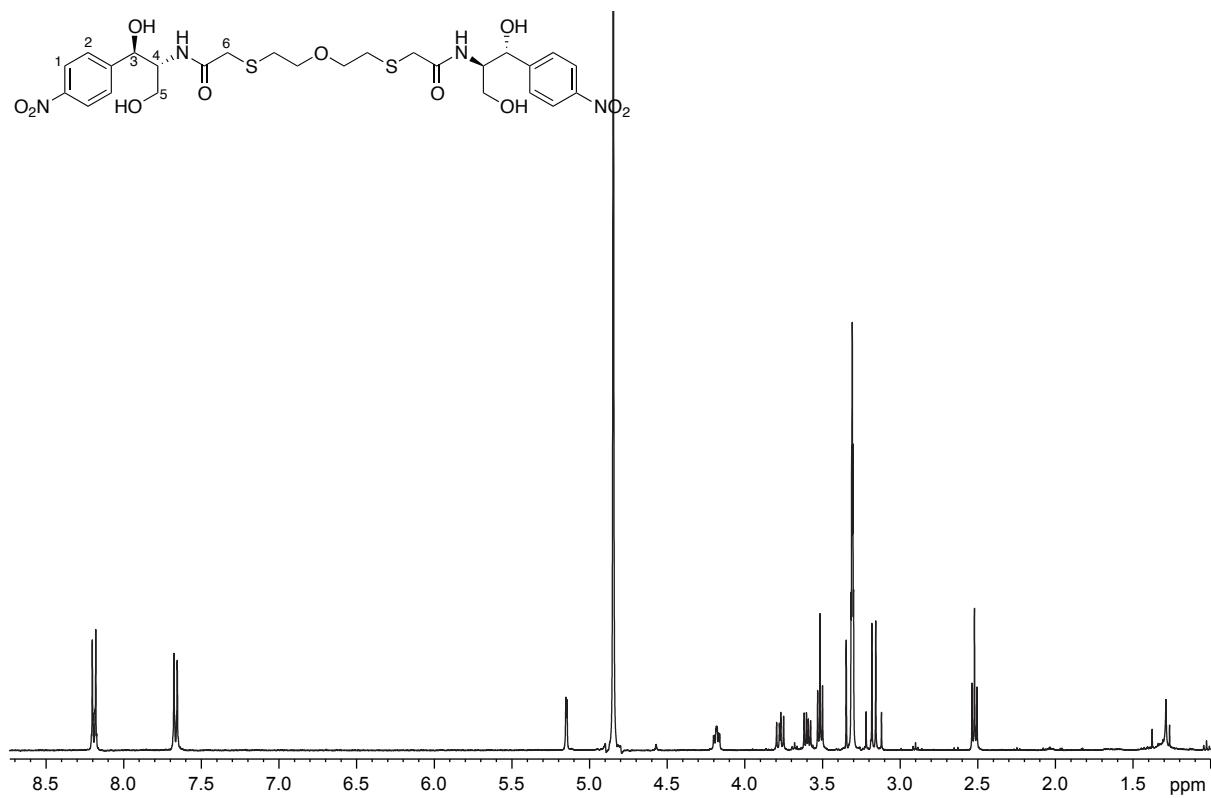

**Fig. S27.** <sup>1</sup>H NMR in CD<sub>3</sub>OD for compound 25.

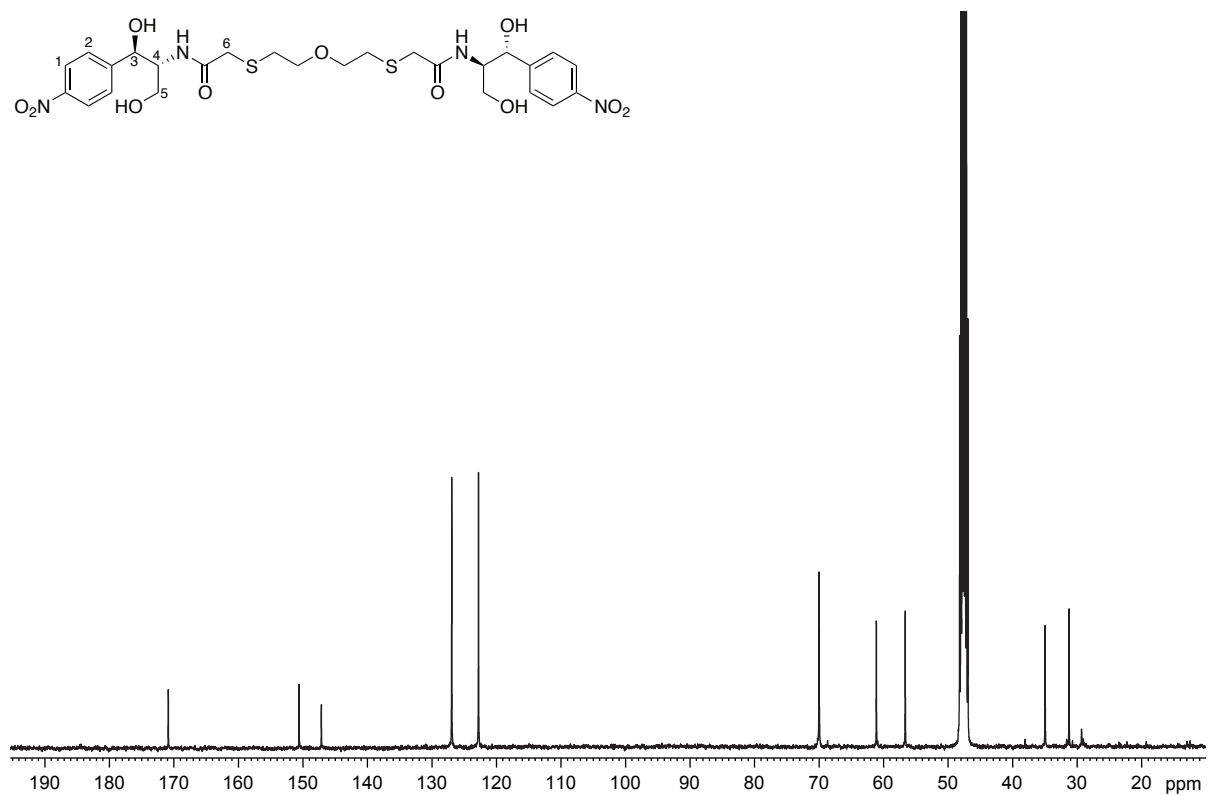

**Fig. S28.** <sup>13</sup>C NMR in CD<sub>3</sub>OD for compound 25.



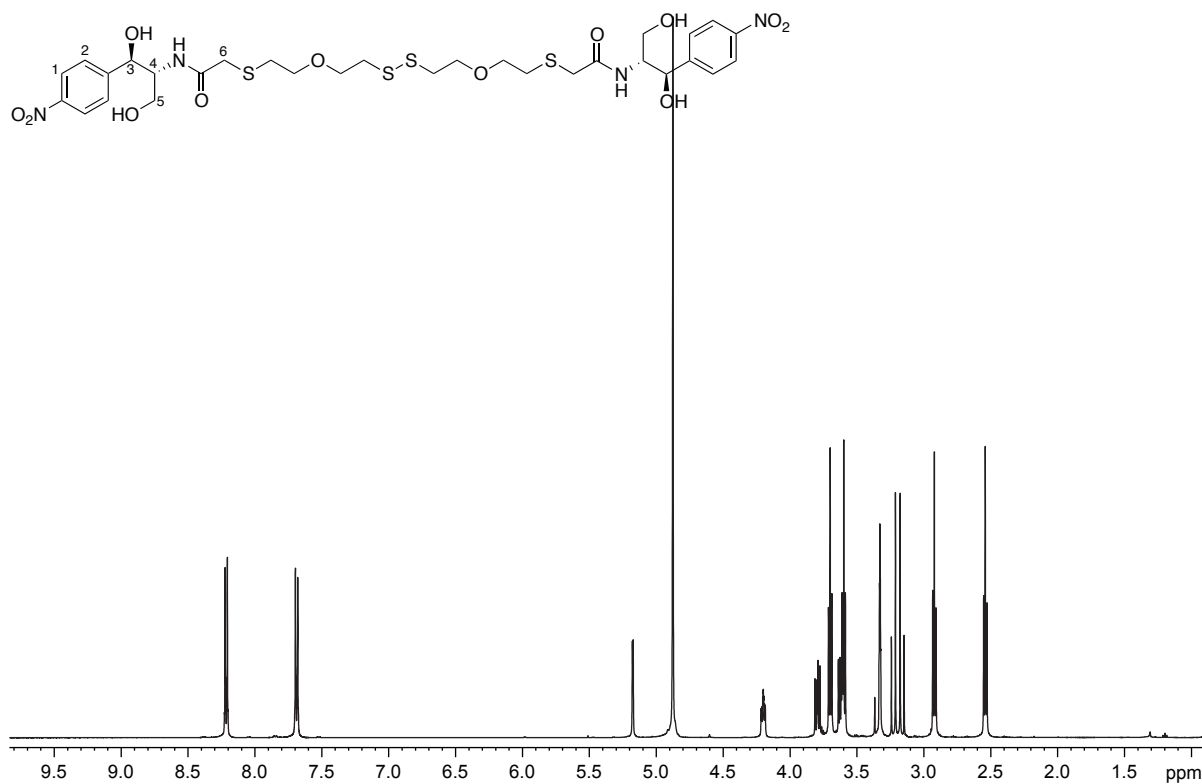

**Fig. S29.** <sup>1</sup>H NMR in CD<sub>3</sub>OD for compound 26.

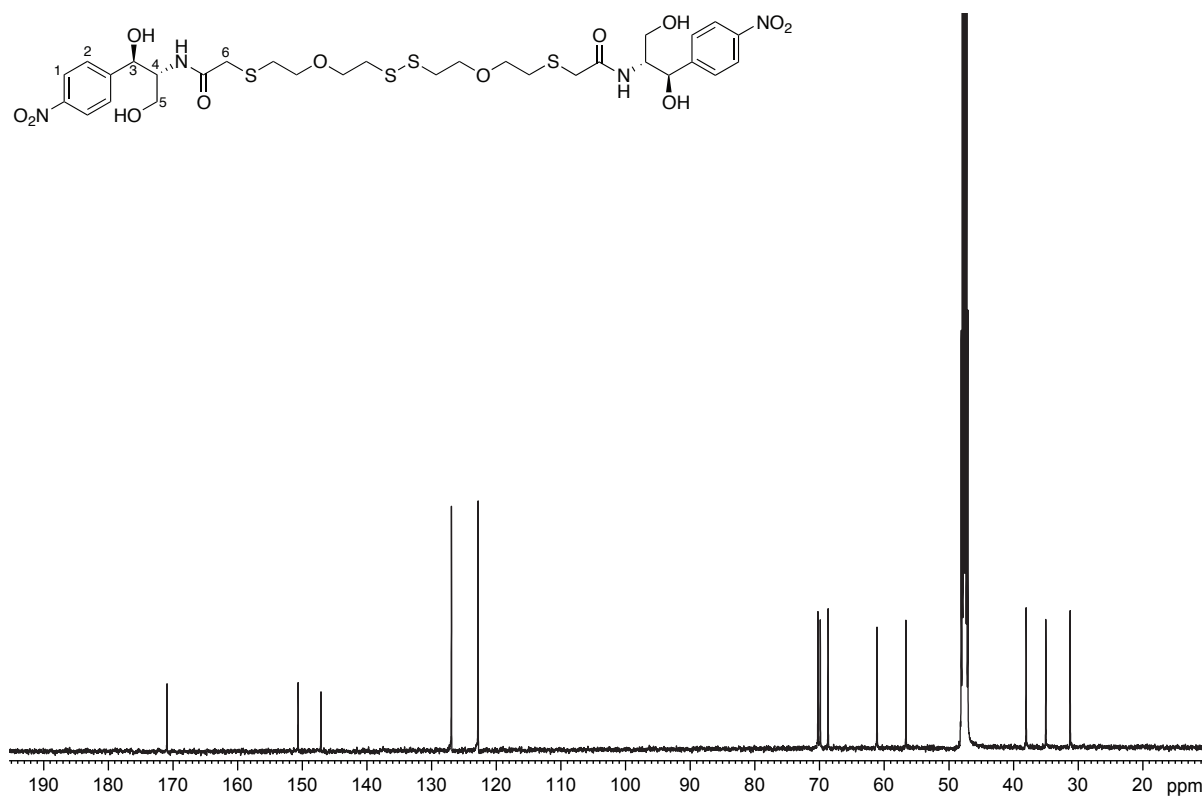

**Fig. S30.** <sup>13</sup>C NMR in CD<sub>3</sub>OD for compound 26.

**Table S2.** Purity of new dimers as determined by RP-HPLC (see Figs. S31-S39 below).

| Compound # | Retention Time (min) | Purity (%) | $\lambda$ max (nm) |
|------------|----------------------|------------|--------------------|
| 10         | 13.19                | 97         | 210                |
| 16         | 14.36                | 97         | 294                |
| 18         | 9.82                 | 96         | 245                |
| 20         | 8.08                 | 99         | 345                |
| 22         | 9.70                 | >99        | 263                |
| 23         | 12.25                | 98         | 243                |
| 24         | 13.98                | >99        | 295                |
| 25         | 13.06                | 98         | 374                |
| 26         | 15.24                | 97         | 384                |

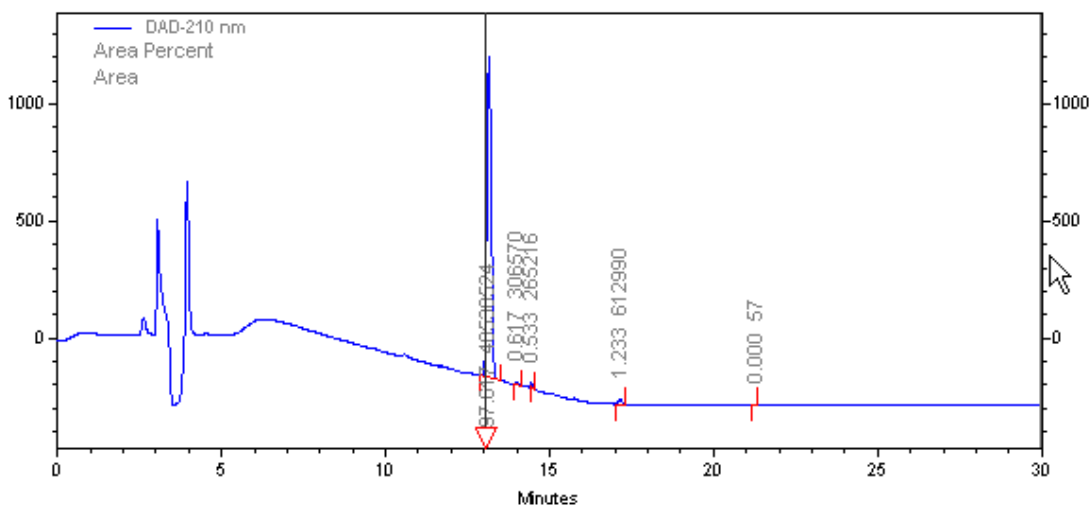

**Fig. S31.** RP-HPLC trace for compound 10.

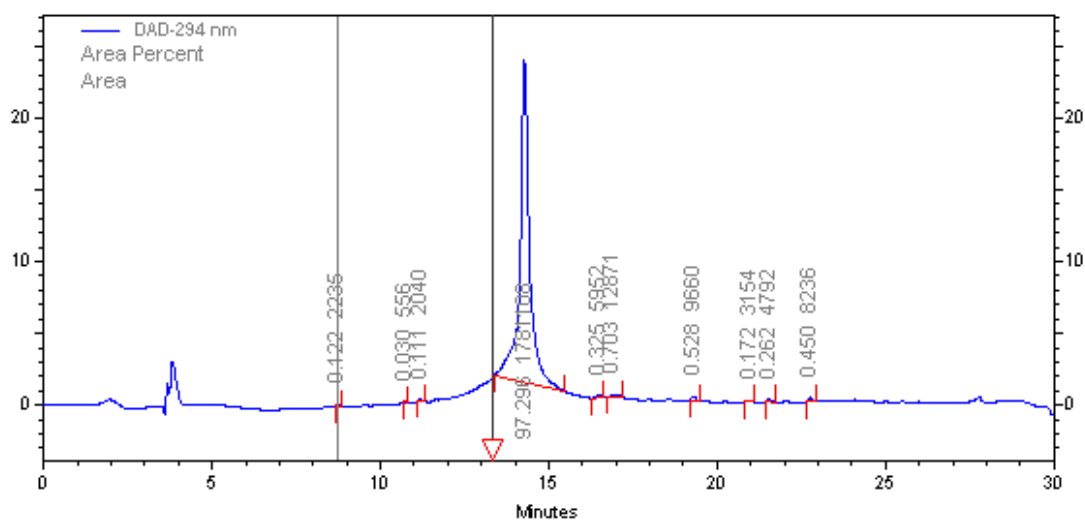

**Fig. S32.** RP-HPLC trace for compound 16.

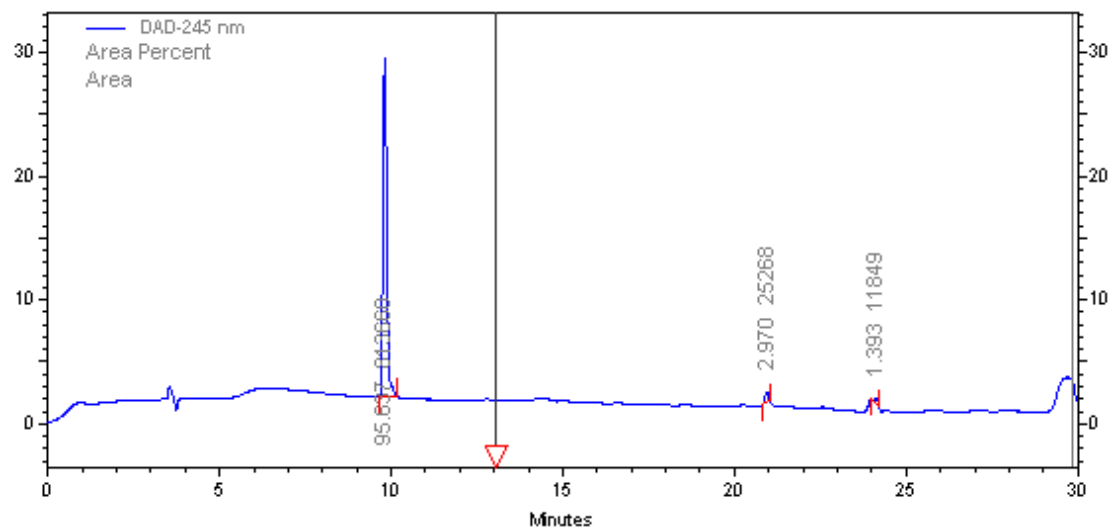

Fig. S33. RP-HPLC trace for compound 18.

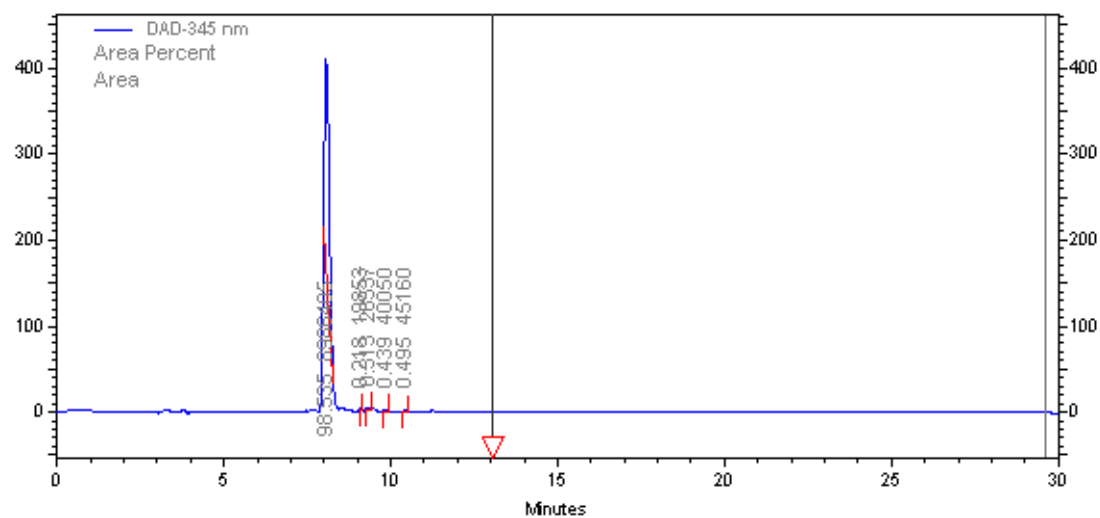

Fig. S34. RP-HPLC trace for compound 20.

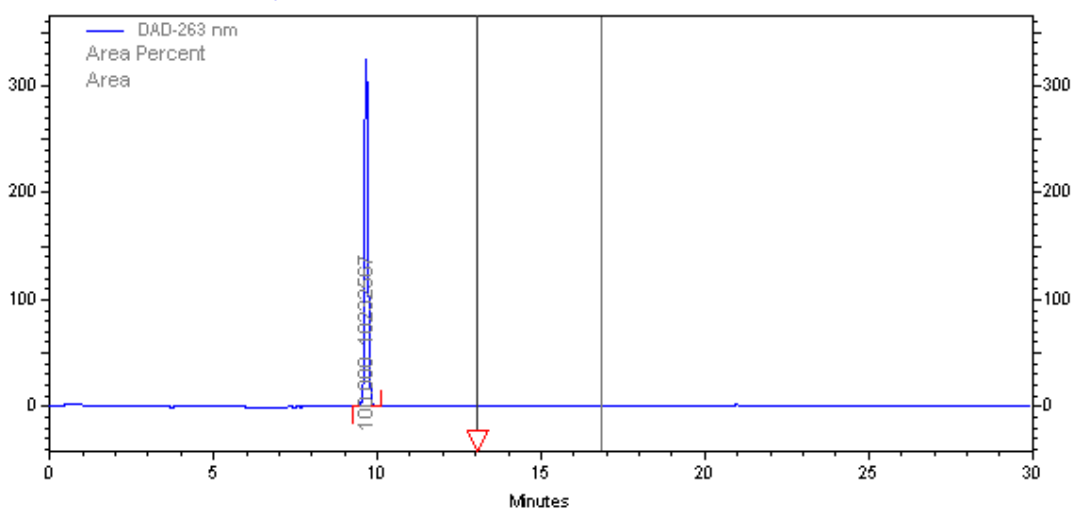

Fig. S35. RP-HPLC trace for compound 22.

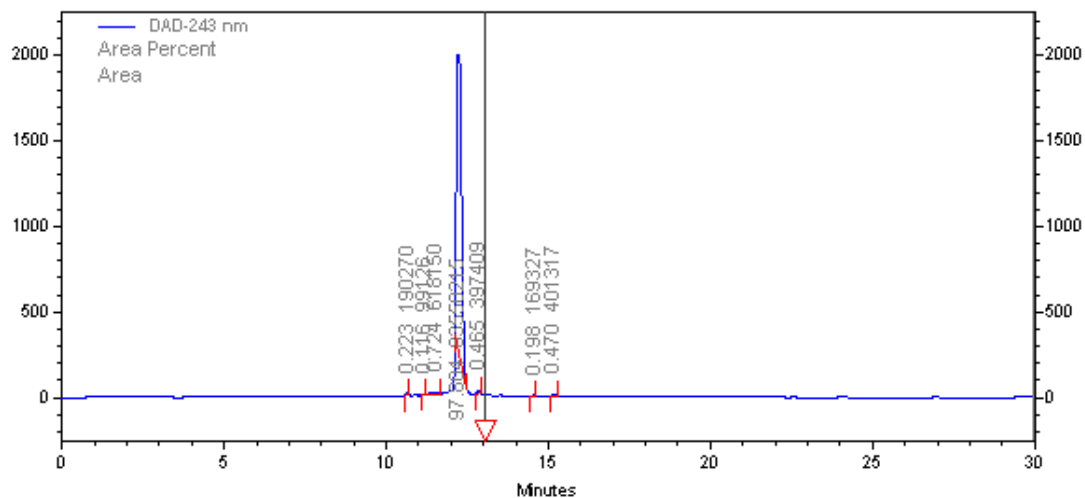

Fig. S36. RP-HPLC trace for compound 23.

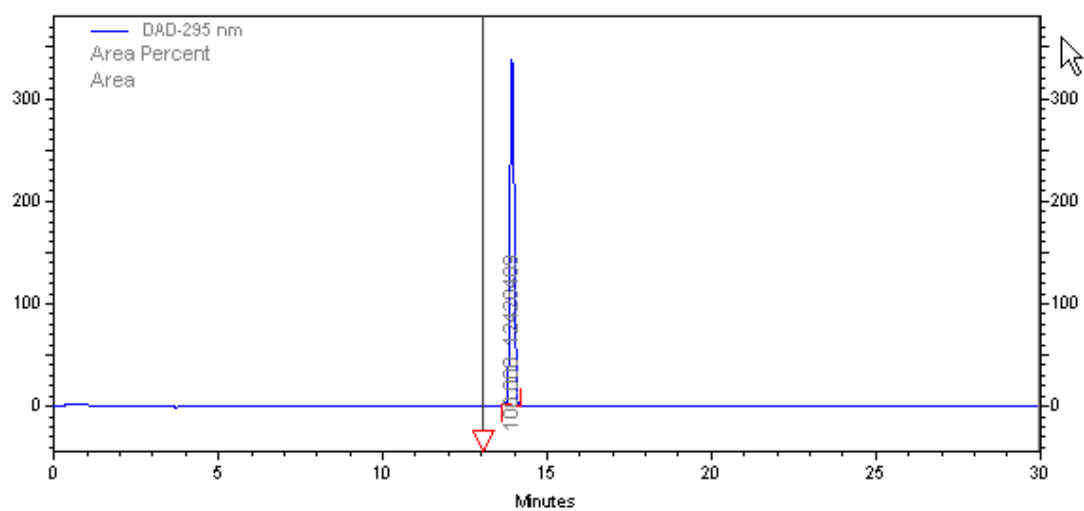

Fig. S37. RP-HPLC trace for compound 24.

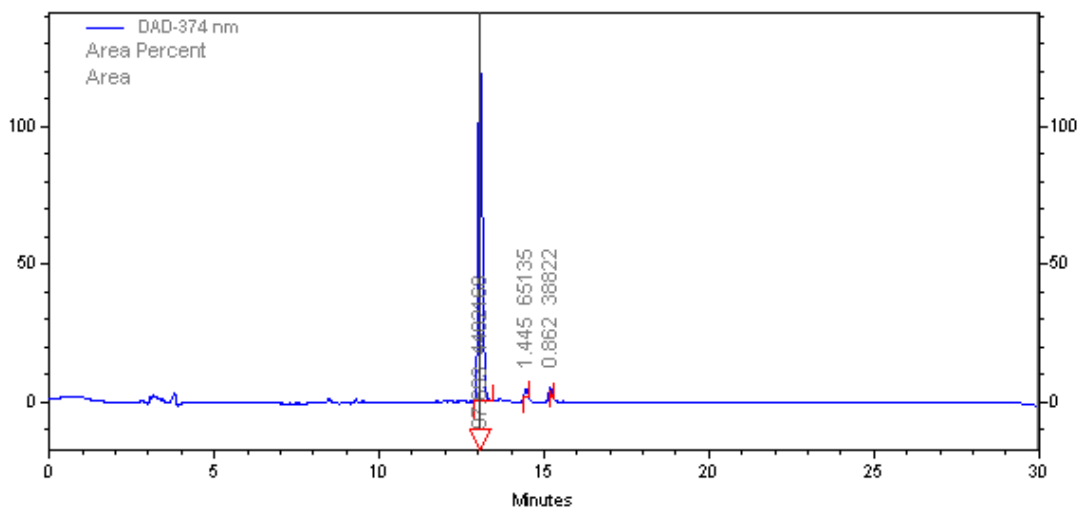

Fig. S38. RP-HPLC trace for compound 25.

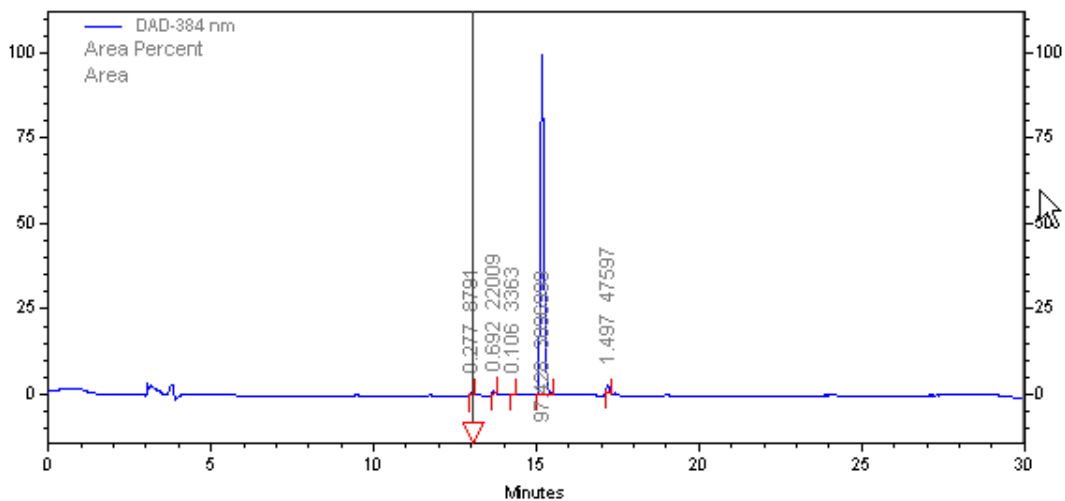

**Fig. S39.** RP-HPLC trace for compound **26**.

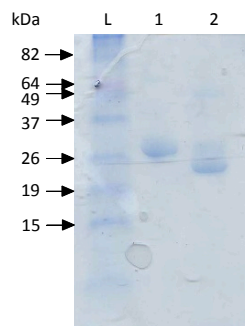

**Fig. S40.** Coomassie blue-stained 15% Tris-HCl SDS-PAGE gel showing the purified 29.2-kDa CPT (Lane 1) and 22.3-kDa CNR (Lane 2) CAM resistance enzymes. L = BenchMark™ Pre-Stained Ladder from Invitrogen. 6  $\mu$ g of each protein was loaded on the gel.
